# Supplementary material for: Stroma derived COL6A3 is a potential prognosis marker of colorectal carcinoma revealed by quantitative proteomics
Source: PubMed Central journal article supplement (PMC4745773; doi:10.18632/oncotarget.4966), 2015-08-12
Supplement: oncotarget-06-29929-s001.pdf [file oncotarget-06-29929-s001.pdf]

## SUPPLEMENTARY FIGURE AND TABLES

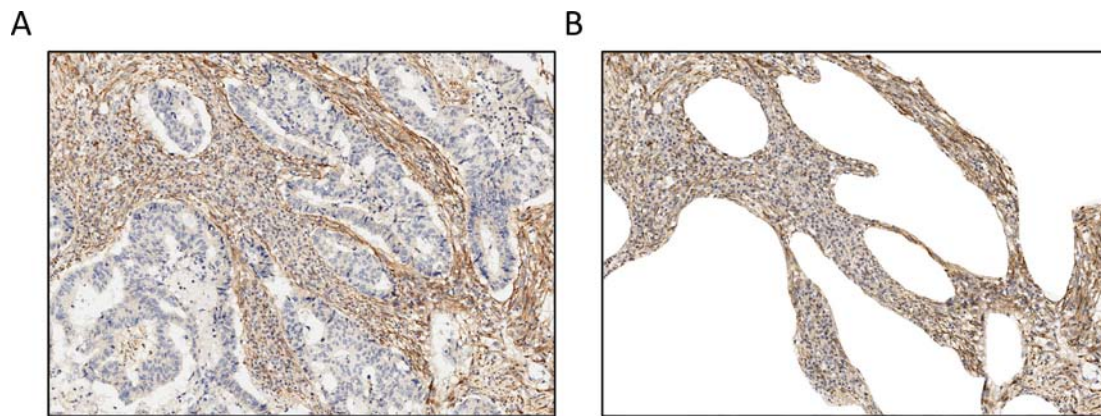

**Supplementary Figure S1: The epithelial region was blocked before the integrated optical density (IOD) analysis of the stromal region.** A. A local picture picked from one CRC sample showing the cancerous epithelial cells and the adjacent stromal cells. B. The epithelial regions were filled with white color and only the stromal region was subjected to IOD analysis by Image Pro Plus.

**Supplementary Table S1: FDR analysis results performed by the built-in Proteomics Performance Evaluation Pipeline Software (PSPEP) in ProteinPilot.**

**Supplementary Table S2: iTRAQ analysis of the secreted proteins from the colonic fibroblasts and colon cancer cell lines.**

**Supplementary Table S3: Gene Ontology enrichment analysis of identified fibroblast- or epithelial cancer cell-enriched proteins.**

**Supplementary Table S4: Ingenuity Pathway Analysis (IPA) of identified fibroblast- or epithelial cancer cell-enriched proteins.**

**Supplementary Table S5: The clinicopathological factors of the colorectal cancer patients in the tissue microarray.**

**Supplementary Table S6: Correlation between the mRNA expressions of *COL6A3* and clinicopathological variables in patients with colorectal cancer revealed by datamining of Oncomine gene array datasets**

| Oncomine dataset        | Clinicopathological parameters | Total cases | mRNA expression   |                    | X <sup>2</sup> | p value |
|-------------------------|--------------------------------|-------------|-------------------|--------------------|----------------|---------|
|                         |                                |             | Lower-than-median | Higher-than-median |                |         |
| <b>Bittner Colon</b>    |                                |             |                   |                    |                |         |
|                         | <b>Dukes Stage</b>             |             |                   |                    |                |         |
|                         | A                              | 49          | 32                | 17                 | 13.596         | 0.001   |
|                         | B                              | 101         | 51                | 50                 |                |         |
|                         | C-D                            | 87          | 29                | 58                 |                |         |
|                         | <b>Smoking Status</b>          |             |                   |                    |                |         |
|                         | Never Smoker                   | 179         | 101               | 78                 | 5.448          | 0.02    |
|                         | Smoker                         | 194         | 86                | 108                |                |         |
|                         | <b>Stage</b>                   |             |                   |                    |                |         |
|                         | 0-I                            | 52          | 35                | 17                 | 14.951         | 0.002   |
|                         | II                             | 103         | 49                | 54                 |                |         |
|                         | III                            | 85          | 30                | 55                 |                |         |
|                         | IV                             | 88          | 49                | 39                 |                |         |
|                         | <b>T stage</b>                 |             |                   |                    |                |         |
|                         | Tis-T1                         | 15          | 12                | 3                  | 9.311          | 0.025   |
|                         | T2                             | 55          | 31                | 24                 |                |         |
|                         | T3                             | 220         | 97                | 123                |                |         |
|                         | T4                             | 28          | 15                | 13                 |                |         |
|                         | <b>Tobacco Use</b>             |             |                   |                    |                |         |
|                         | Yes                            | 194         | 86                | 108                | 5.448          | 0.02    |
|                         | No                             | 179         | 101               | 78                 |                |         |
| <b>Smith Colorectal</b> |                                |             |                   |                    |                |         |
|                         | <b>Recurrence Status</b>       |             |                   |                    |                |         |
|                         | Recurrence                     | 36          | 11                | 25                 | 7.502          | 0.006   |
|                         | No Recurrence                  | 109         | 62                | 47                 |                |         |

The analysis was performed using datasets from the Oncomine cancer gene expression microarray DB (<https://www.oncomine.org/resource/login.html>).

**Supplementary Table S7: Correlation between stromal or epithelial expression of COL6A3 and clinicopathological variables of 90 colorectal cancer cases used in TMA-IHC analysis**

| Clinicopathological parameters | Stroma expression |        |     |                                       | Epithelia expression  |             |        |     |                                       |                       |
|--------------------------------|-------------------|--------|-----|---------------------------------------|-----------------------|-------------|--------|-----|---------------------------------------|-----------------------|
|                                | Total cases       | COL6A3 |     | X <sup>2</sup> or Fisher's exact test | <i>p</i> <sup>a</sup> | Total cases | COL6A3 |     | X <sup>2</sup> or Fisher's exact test | <i>p</i> <sup>a</sup> |
|                                |                   | (-)    | (+) |                                       |                       |             | (-)    | (+) |                                       |                       |
| <b>Gender</b>                  |                   |        |     |                                       |                       |             |        |     |                                       |                       |
| Male                           | 44                | 14     | 30  |                                       | <b>0.268</b>          | 44          | 16     | 28  |                                       | <b>0.8234</b>         |
| Female                         | 42                | 19     | 23  |                                       |                       | 42          | 14     | 28  |                                       |                       |
| <b>Age</b>                     |                   |        |     |                                       |                       |             |        |     |                                       |                       |
| ≤ 70                           | 45                | 16     | 29  |                                       | <b>0.506</b>          | 45          | 15     | 30  |                                       | <b>0.8221</b>         |
| > 70                           | 39                | 17     | 22  |                                       |                       | 39          | 14     | 25  |                                       |                       |
| <b>Grade</b>                   |                   |        |     |                                       |                       |             |        |     |                                       |                       |
| I                              | 5                 | 2      | 3   | 1.951, 2                              | 0.377                 | 5           | 0      | 5   | 3.065, 2                              | 0.216                 |
| II                             | 47                | 21     | 26  |                                       |                       | 47          | 17     | 30  |                                       |                       |
| III                            | 34                | 10     | 24  |                                       |                       | 35          | 14     | 21  |                                       |                       |
| <b>Positive Lymph Nodes</b>    |                   |        |     |                                       |                       |             |        |     |                                       |                       |
| 0                              | 48                | 18     | 30  |                                       | <b>1</b>              | 48          | 18     | 30  |                                       | <b>0.81</b>           |
| 1–12                           | 31                | 12     | 19  |                                       |                       | 31          | 10     | 21  |                                       |                       |
| <b>T stage</b>                 |                   |        |     |                                       |                       |             |        |     |                                       |                       |
| T1                             | 3                 | 2      | 1   | 1.379, 3                              | 0.7105                | 3           | 1      | 2   | 1.002, 3                              | 0.8007                |
| T2                             | 6                 | 2      | 4   |                                       |                       | 6           | 1      | 5   |                                       |                       |
| T3                             | 65                | 24     | 41  |                                       |                       | 65          | 23     | 42  |                                       |                       |
| T4                             | 10                | 3      | 7   |                                       |                       | 10          | 4      | 6   |                                       |                       |
| <b>N stage</b>                 |                   |        |     |                                       |                       |             |        |     |                                       |                       |
| N0                             | 54                | 20     | 34  | 1.903, 2                              | 0.3862                | 54          | 19     | 35  | 0.01179, 2                            | 0.9941                |
| N1                             | 23                | 11     | 12  |                                       |                       | 23          | 8      | 15  |                                       |                       |
| N2                             | 9                 | 2      | 7   |                                       |                       | 9           | 3      | 6   |                                       |                       |
| <b>M stage</b>                 |                   |        |     |                                       |                       |             |        |     |                                       |                       |
| M0                             | 83                | 31     | 52  |                                       | <b>1</b>              | 83          | 30     | 53  |                                       | <b>0.5378</b>         |
| M1                             | 2                 | 1      | 1   |                                       |                       | 2           | 0      | 2   |                                       |                       |
| <b>Stage</b>                   |                   |        |     |                                       |                       |             |        |     |                                       |                       |
| 1                              | 7                 | 4      | 3   | 2.151, 3                              | 0.5417                | 7           | 2      | 5   | 0.1312, 2                             | 0.9365                |
| 2                              | 45                | 14     | 31  |                                       |                       | 45          | 16     | 29  |                                       |                       |
| 3                              | 30                | 12     | 18  |                                       |                       | 32          | 11     | 21  |                                       |                       |
| 4                              | 2                 | 1      | 1   |                                       |                       | 2           | 0      | 2   |                                       |                       |

(Continued)

| Clinicopathological parameters | Stroma expression |        |     |                                       | $p^a$        | Epithelia expression |        |     |                                       | $p^a$    |
|--------------------------------|-------------------|--------|-----|---------------------------------------|--------------|----------------------|--------|-----|---------------------------------------|----------|
|                                | Total cases       | COL6A3 |     | X <sup>2</sup> or Fisher's exact test |              | Total cases          | COL6A3 |     | X <sup>2</sup> or Fisher's exact test |          |
|                                |                   | (-)    | (+) |                                       |              |                      | (-)    | (+) |                                       |          |
| <b>Survival time (month)</b>   |                   |        |     |                                       |              |                      |        |     |                                       |          |
| ≤40                            | 30                | 7      | 23  |                                       | <b>0.033</b> | 30                   | 10     | 20  |                                       | <b>1</b> |
| >40                            | 49                | 24     | 25  |                                       |              | 49                   | 16     | 33  |                                       |          |
| <b>Survival status</b>         |                   |        |     |                                       |              |                      |        |     |                                       |          |
| Dead                           | 42                | 12     | 30  |                                       | <b>0.08</b>  | 42                   | 15     | 27  |                                       | <b>1</b> |
| Alive                          | 44                | 21     | 23  |                                       |              | 44                   | 15     | 29  |                                       |          |

<sup>a</sup>The bold  $p$  values were calculated using Fisher's exact test.

**Supplementary Table S8: Plasma samples used for ELISA analysis of COL6A3 concentration**

| Sample code | Sample types | Sex    | Age | Clinical diagnosis | Pathologic diagnosis | Lymph node metastasis |
|-------------|--------------|--------|-----|--------------------|----------------------|-----------------------|
| C1          | Colon cancer | Male   | 78  | Colon cancer       | Adenocarcinoma       | Yes                   |
| C2          | Colon cancer | Female | 61  | Colon cancer       | Adenocarcinoma       | Yes                   |
| C3          | Colon cancer | Male   | 64  | Colon cancer       | Adenocarcinoma       | Yes                   |
| C4          | Colon cancer | Female | 57  | Colon cancer       | Adenocarcinoma       | No                    |
| C5          | Colon cancer | Male   | 47  | Colon cancer       | Adenocarcinoma       | Yes                   |
| C6          | Colon cancer | Male   | 82  | Colon cancer       | Adenocarcinoma       | Yes                   |
| C7          | Colon cancer | Male   | 82  | Colon cancer       | Adenocarcinoma       | Yes                   |
| C8          | Colon cancer | Male   | 55  | Colon cancer       | Adenocarcinoma       | No                    |
| C9          | Colon cancer | Male   | 60  | Colon cancer       | Adenocarcinoma       | No                    |
| C10         | Colon cancer | Female | 55  | Colon cancer       | Adenocarcinoma       | No                    |
| C11         | Colon cancer | Male   | 71  | Colon cancer       | Adenocarcinoma       | No                    |
| C12         | Colon cancer | Female | 40  | Colon cancer       | Adenocarcinoma       | Yes                   |
| C13         | Colon cancer | Female | 63  | Colon cancer       | Adenocarcinoma       | Yes                   |
| C14         | Colon cancer | Male   | 66  | Colon cancer       | Adenocarcinoma       | No                    |
| C15         | Colon cancer | Female | 69  | Colon cancer       | Adenocarcinoma       | No                    |
| C16         | Colon cancer | Female | 73  | Colon cancer       | Adenocarcinoma       | No                    |
| C17         | Colon cancer | Female | 77  | Colon cancer       | Adenocarcinoma       | Yes                   |
| C18         | Colon cancer | Male   | 73  | Colon cancer       | Adenocarcinoma       | No                    |
| C19         | Colon cancer | Female | 70  | Colon cancer       | Adenocarcinoma       | Yes                   |
| C20         | Colon cancer | Male   | 65  | Colon cancer       | Adenocarcinoma       | No                    |
| C21         | Colon cancer | Female | 76  | Colon cancer       | Adenocarcinoma       | n/a                   |
| C22         | Colon cancer | Male   | 71  | Colon cancer       | Adenocarcinoma       | No                    |
| C23         | Colon cancer | Male   | 72  | Colon cancer       | Adenocarcinoma       | No                    |
| C24         | Colon cancer | Female | 81  | Colon cancer       | Adenocarcinoma       | No                    |
| C25         | Colon cancer | Male   | 52  | Colon cancer       | Adenocarcinoma       | Yes                   |
| C26         | Colon cancer | Male   | 59  | Colon cancer       | Adenocarcinoma       | No                    |
| C27         | Colon cancer | Male   | 59  | Colon cancer       | Adenocarcinoma       | Yes                   |
| C28         | Colon cancer | Male   | 57  | Colon cancer       | Adenocarcinoma       | No                    |
| C29         | Colon cancer | Male   | 43  | Colon cancer       | Adenocarcinoma       | No                    |
| C30         | Colon cancer | Male   | 61  | Colon cancer       | Adenocarcinoma       | n/a                   |
| C31         | Colon cancer | Male   | 66  | Colon cancer       | Adenocarcinoma       | Yes                   |
| C32         | Colon cancer | Female | 42  | Colon cancer       | Adenocarcinoma       | No                    |
| C33         | Colon cancer | Male   | 57  | Colon cancer       | Adenocarcinoma       | Yes                   |
| C34         | Colon cancer | Male   | 67  | Colon cancer       | Adenocarcinoma       | Yes                   |

(Continued)

| Sample code | Sample types | Sex    | Age | Clinical diagnosis   | Pathologic diagnosis | Lymph node metastasis |
|-------------|--------------|--------|-----|----------------------|----------------------|-----------------------|
| C35         | Colon cancer | Male   | 80  | Colon cancer         | Adenocarcinoma       | No                    |
| C36         | Colon cancer | Male   | 85  | Colon cancer         | Adenocarcinoma       | No                    |
| C37         | Colon cancer | Male   | 70  | Colon cancer         | Adenocarcinoma       | No                    |
| C38         | Colon cancer | Male   | 66  | Colon cancer         | Adenocarcinoma       | No                    |
| C39         | Colon cancer | Female | 70  | Colon cancer         | Adenocarcinoma       | Yes                   |
| C40         | Colon cancer | Male   | 60  | Colon cancer         | Adenocarcinoma       | No                    |
| C41         | Colon cancer | Male   | 64  | Colon cancer         | Adenocarcinoma       | No                    |
| C42         | Colon cancer | Female | 61  | Colon cancer         | Adenocarcinoma       |                       |
| N26         | Normal       | Male   | 71  | Physical examination | –                    | –                     |
| N27         | Normal       | Male   | 45  | Physical examination | –                    | –                     |
| N28         | Normal       | Male   | 47  | Physical examination | –                    | –                     |
| N39         | Normal       | Male   | 41  | Physical examination | –                    | –                     |
| N40         | Normal       | Female | 62  | Physical examination | –                    | –                     |
| N41         | Normal       | Female | 65  | Physical examination | –                    | –                     |
| N42         | Normal       | Female | 47  | Physical examination | –                    | –                     |
| N43         | Normal       | Female | 49  | Physical examination | –                    | –                     |
| N44         | Normal       | Male   | 27  | Physical examination | –                    | –                     |
| N45         | Normal       | Female | 65  | Physical examination | –                    | –                     |
| N46         | Normal       | Female | 51  | Physical examination | –                    | –                     |
| N47         | Normal       | Female | 40  | Physical examination | –                    | –                     |
| N48         | Normal       | Male   | 41  | Physical examination | –                    | –                     |
| N1          | Normal       | Female | 36  | Physical examination | –                    | –                     |
| N2          | Normal       | Male   | 52  | Physical examination | –                    | –                     |
| N3          | Normal       | Male   | 41  | Physical examination | –                    | –                     |
| N4          | Normal       | Female | 20  | Physical examination | –                    | –                     |
| N5          | Normal       | Female | 52  | Physical examination | –                    | –                     |
| N6          | Normal       | Male   | 37  | Physical examination | –                    | –                     |
| N7          | Normal       | Female | 23  | Physical examination | –                    | –                     |
| N8          | Normal       | Female | 55  | Physical examination | –                    | –                     |
| N9          | Normal       | Female | 26  | Physical examination | –                    | –                     |
| N10         | Normal       | Male   | 25  | Physical examination | –                    | –                     |
| N11         | Normal       | Male   | 60  | Physical examination | –                    | –                     |
| N12         | Normal       | Female | 27  | Physical examination | –                    | –                     |
| N13         | Normal       | Male   | 21  | Physical examination | –                    | –                     |

(Continued)

| Sample code | Sample types | Sex    | Age | Clinical diagnosis   | Pathologic diagnosis | Lymph node metastasis |
|-------------|--------------|--------|-----|----------------------|----------------------|-----------------------|
| N14         | Normal       | Female | 24  | Physical examination | –                    | –                     |
| N15         | Normal       | Male   | 22  | Physical examination | –                    | –                     |
| N16         | Normal       | Male   | 28  | Physical examination | –                    | –                     |
| N17         | Normal       | Female | 47  | Physical examination | –                    | –                     |
| N18         | Normal       | Male   | 20  | Physical examination | –                    | –                     |
| N19         | Normal       | Female | 51  | Physical examination | –                    | –                     |
| N20         | Normal       | Female | 50  | Physical examination | –                    | –                     |
| N21         | Normal       | Female | 65  | Physical examination | –                    | –                     |
| N22         | Normal       | Female | 20  | Physical examination | –                    | –                     |
| N23         | Normal       | Female | 70  | Physical examination | –                    | –                     |
| N24         | Normal       | Male   | 66  | Physical examination | –                    | –                     |
| N25         | Normal       | Male   | 26  | Physical examination | –                    | –                     |
| N26         | Normal       | Female | 19  | Physical examination | –                    | –                     |
| N27         | Normal       | Male   | 19  | Physical examination | –                    | –                     |
| N28         | Normal       | Female | 38  | Physical examination | –                    | –                     |
| N29         | Normal       | Female | n/a | Physical examination | –                    | –                     |
| N30         | Normal       | Female | 20  | Physical examination | –                    | –                     |
| N31         | Normal       | Female | 22  | Physical examination | –                    | –                     |
| N32         | Normal       | Male   | 42  | Physical examination | –                    | –                     |
| N33         | Normal       | Female | 39  | Physical examination | –                    | –                     |
| N34         | Normal       | Male   | 25  | Physical examination | –                    | –                     |
| N35         | Normal       | Male   | 66  | Physical examination | –                    | –                     |
